# Supplementary material for: One-step immobilization antibodies using ferrocene-containing thiol aromatic aldehyde for the fabrication of a label-free electrochemical immunosensor
Source: Royal Society of Chemistry journal article supplement (doi:10.1039/c6ra24122k), 2016-01-01

## Supporting Information

### **One-step immobilization antibodies using ferrocene-containing thiol aromatic aldehyde for the fabrication of a label-free electrochemical immunosensor**

Xiaoying Liu<sup>\*a</sup> Qiang Li<sup>a</sup>, Lijuan Chen<sup>a</sup>, Jiheng Zhou<sup>a</sup>, Meiling Liu<sup>c</sup> and  
Youming Shen<sup>\*b</sup>

<sup>a</sup>College of Science, Science and Technological Innovation Platform, Hunan Agricultural University, ChangSha 410128, PR China

<sup>b</sup>College of Chemistry and Chemical Engineering, Hunan University of Arts and Science, ChangDe 415000, PR China

<sup>c</sup>Key Laboratory of Chemical Biology and Traditional Chinese Medicine Research (Ministry of Education), College of Chemistry and Chemical Engineering, Hunan Normal University, Changsha 410081, PR China

---

\*Corresponding author. E-mail address: xiaoyingliu@126.com (X. Liu), ymshen79@163.com (Y. Shen).

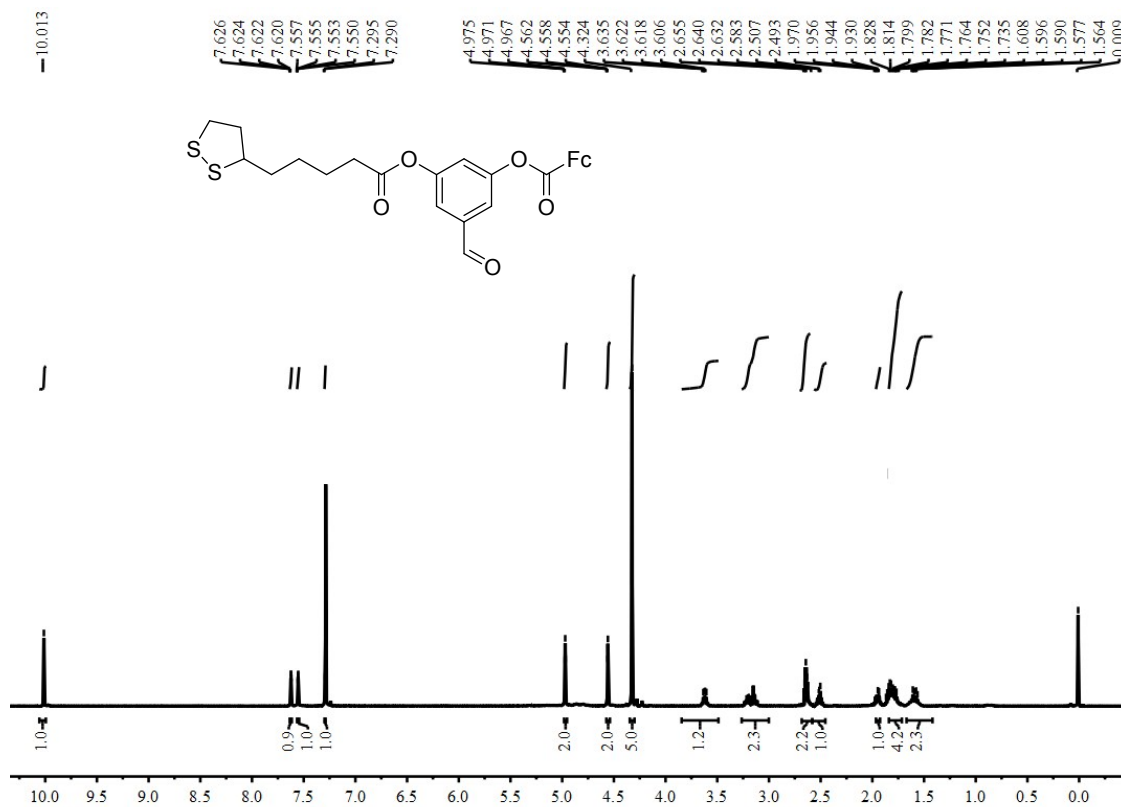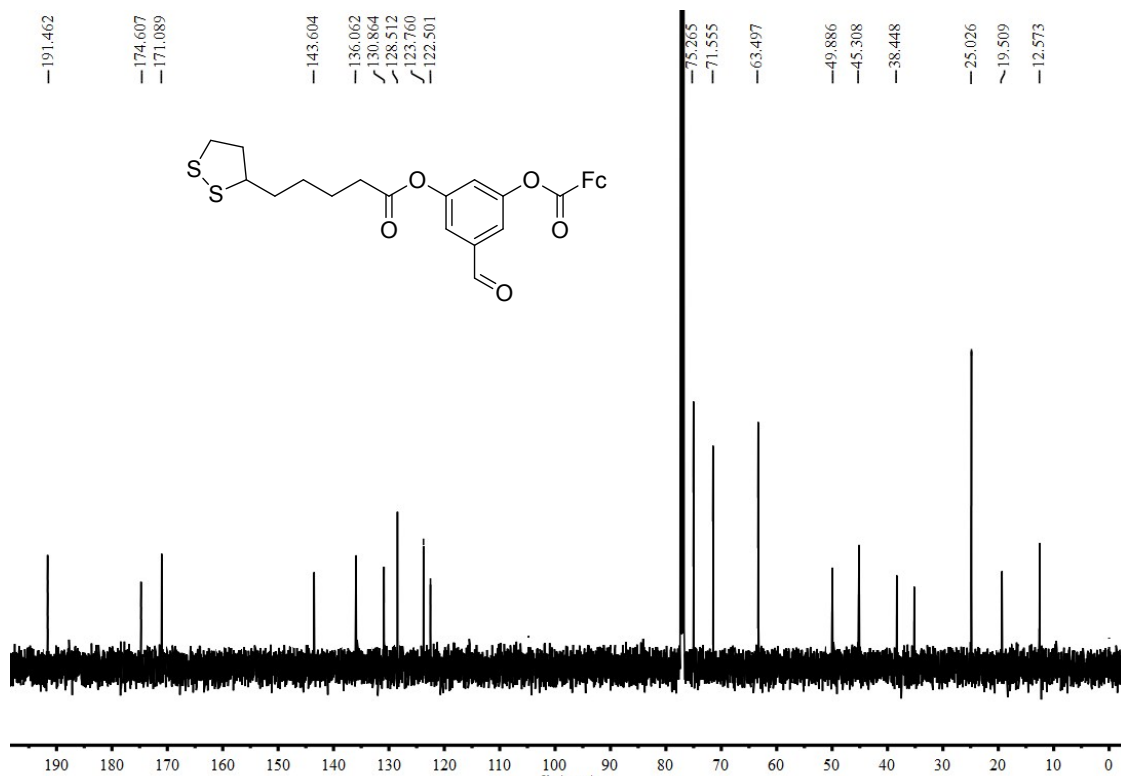

Supplement: c6ra24122k1.pdf [file c6ra24122k1.pdf]
